# Supplementary material for: Global analysis of Poales diversification – parallel evolution in space and time into open and closed habitats
Source: PubMed Central journal article supplement — New Phytol. 2023 Nov 27;242(2):727–43. doi: 10.1111/nph.19421 (PMC11497318; doi:10.1111/nph.19421), 2023-11-27
Supplement: NPH-242-727-s002.pdf [file NPH-242-727-s002.pdf]

## **New Phytologist Supporting Information**

Article Title: Global analysis of Poales diversification – parallel evolution in space and time into open and closed habitats

Authors: Tammy L Elliott, Daniel Spalink, Isabel Larridon, Alexandre Rizzo Zuntini, Marcial Escudero, Jan Hackel, Russell L Barrett, Santiago Martín-Bravo, José Ignacio Márquez-Corro, Carolina Granados Mendoza, Aluoneswi C. Mashau, Katya J Romero-Soler, Daniel A Zhigila, Berit Gehrke, Caroline Oliveira Andrino, Darren M Crayn, Maria S Vorontsova<sup>4</sup>, Félix Forest, William J Baker, Karen L Wilson, David A Simpson, A Muthama Muasya

Article acceptance date: 3 November 2023

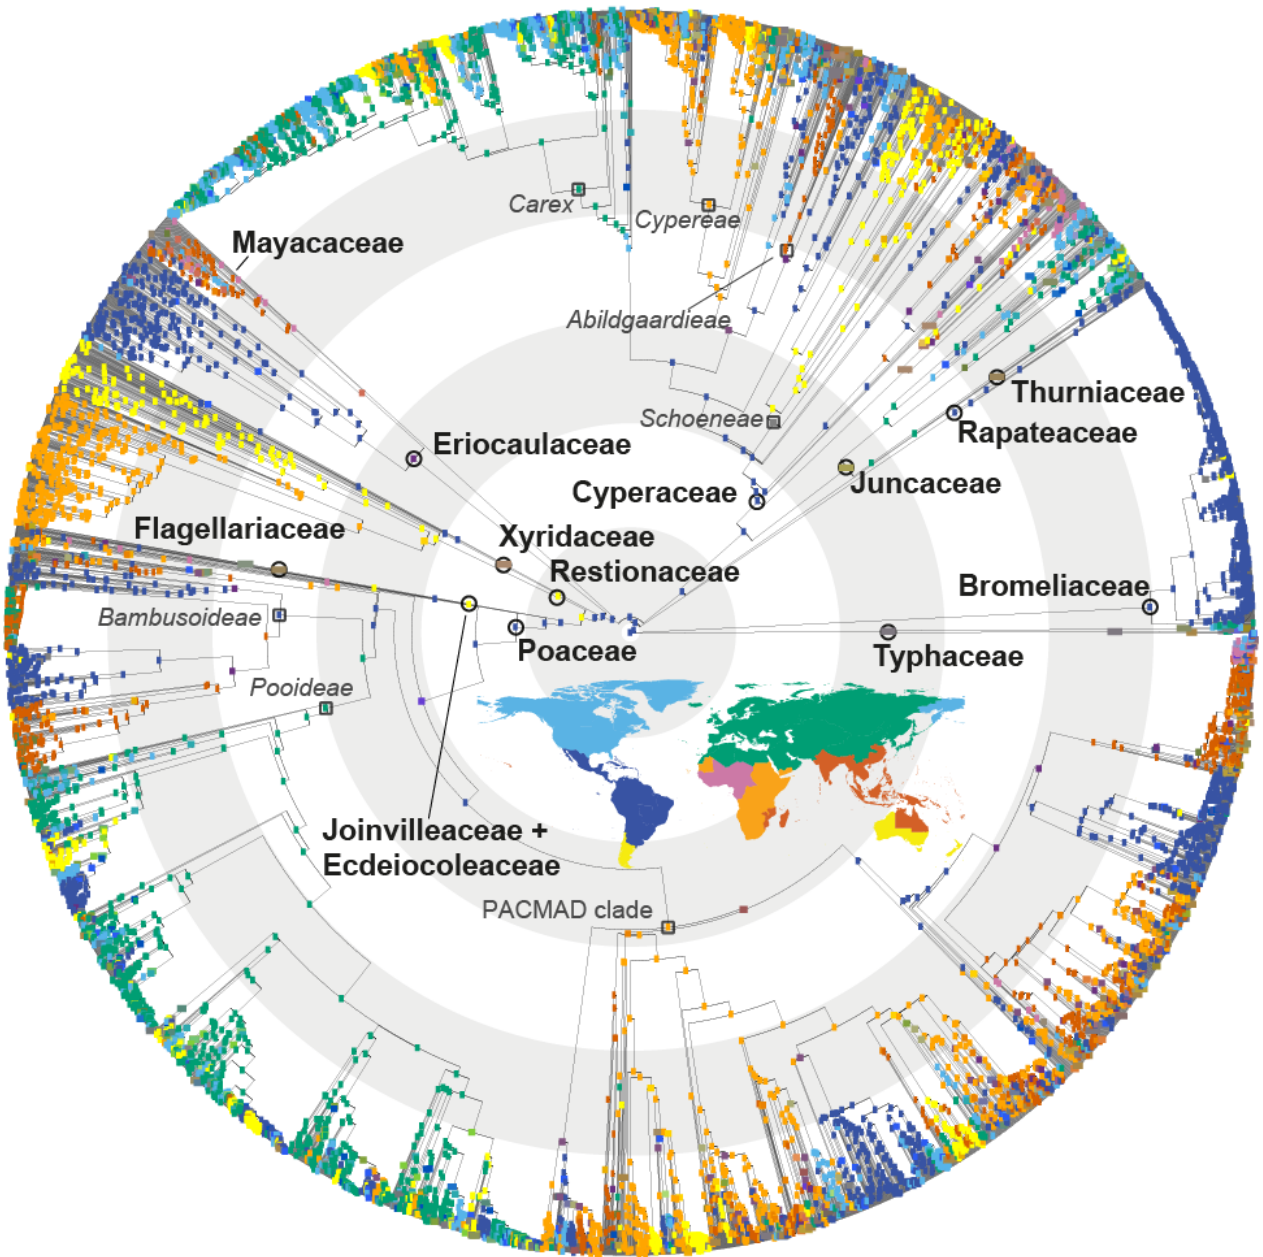

**Figure S1.** Ancestral area reconstruction within Poales based on seven regions, obtained using the DIVA model in BioGeoBEARS.

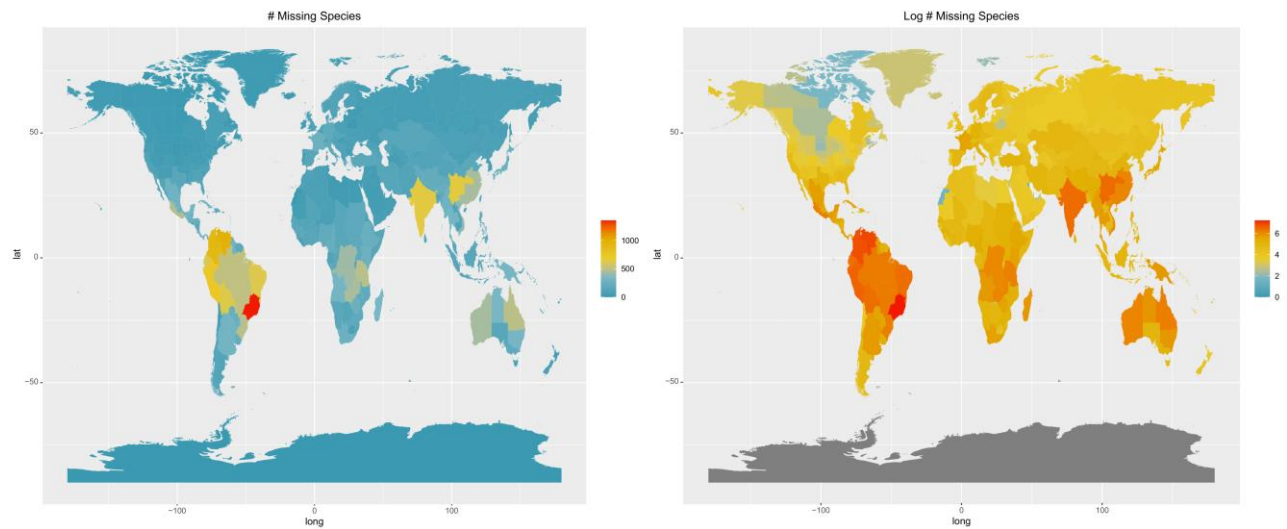

**Figure S2.** The number of species of Poales missing from the phylogenetic dataset compared to the number listed in the World Checklist of Vascular Plants (WCVP) as of 28 February 2022, mapped per botanical region.

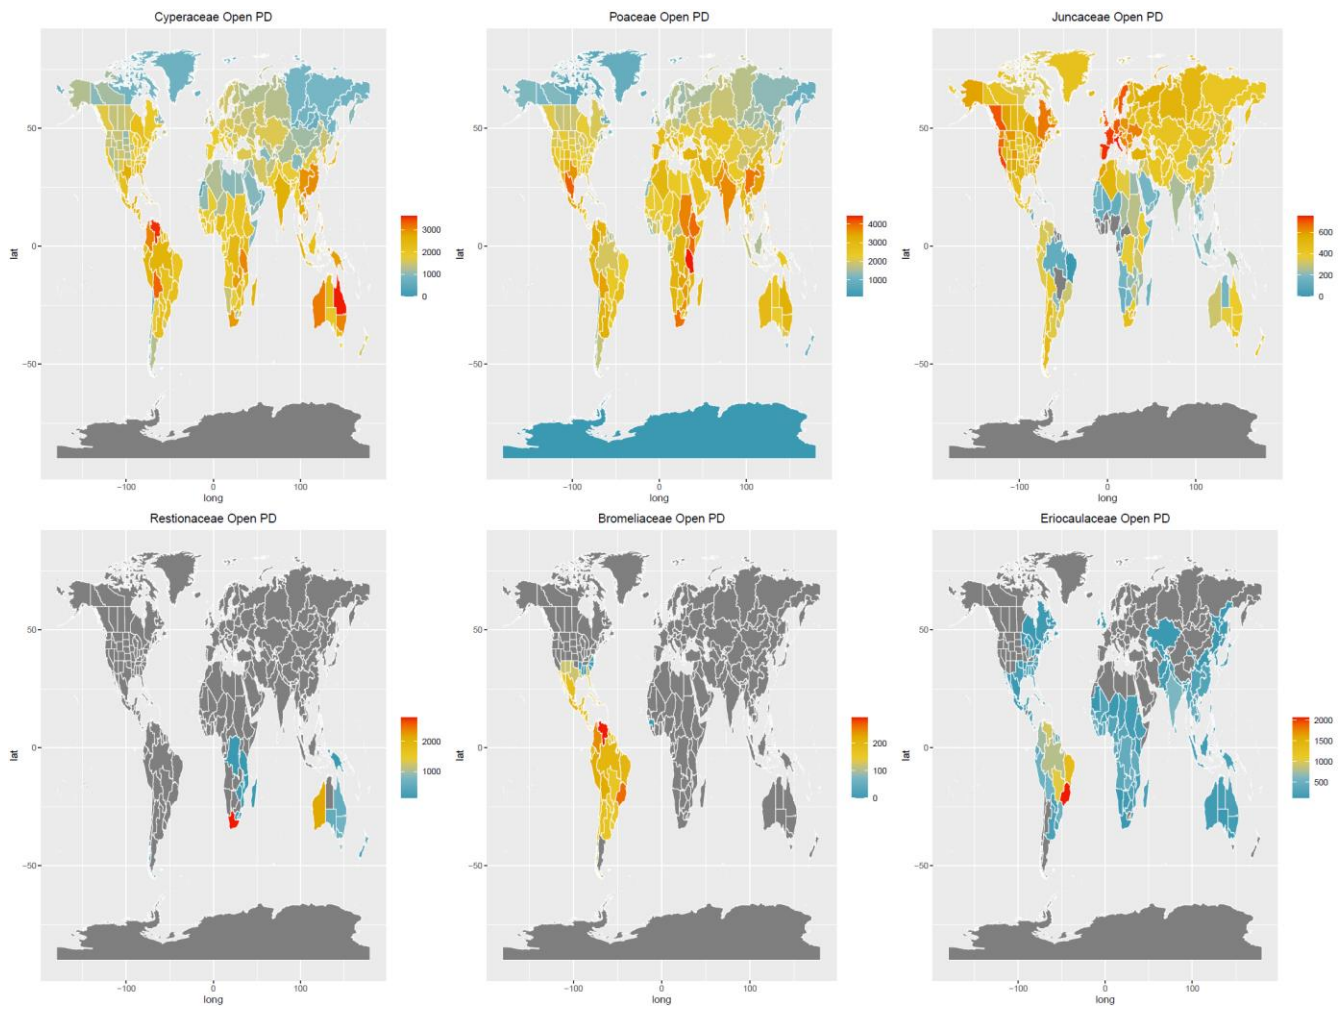

**Figure S3.** Phylogenetic diversity (PD) of the six largest Poales families categorised into open and closed habitats.

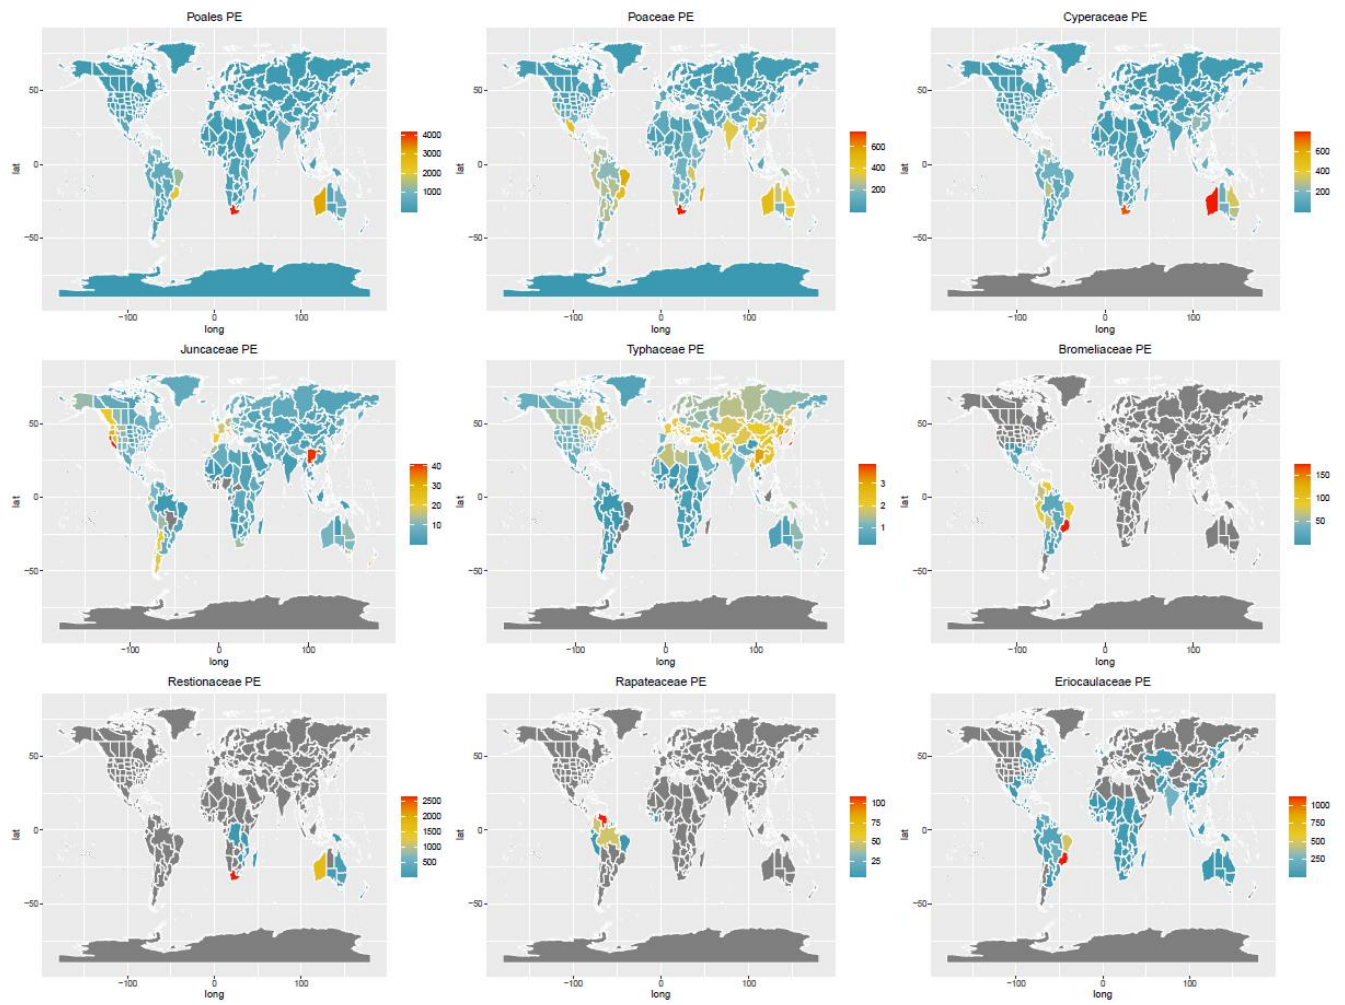

**Figure S4.** Phylogenetic endemicity (PE) mapped per botanical region for Poales and eight families with the highest number of species in the dataset.

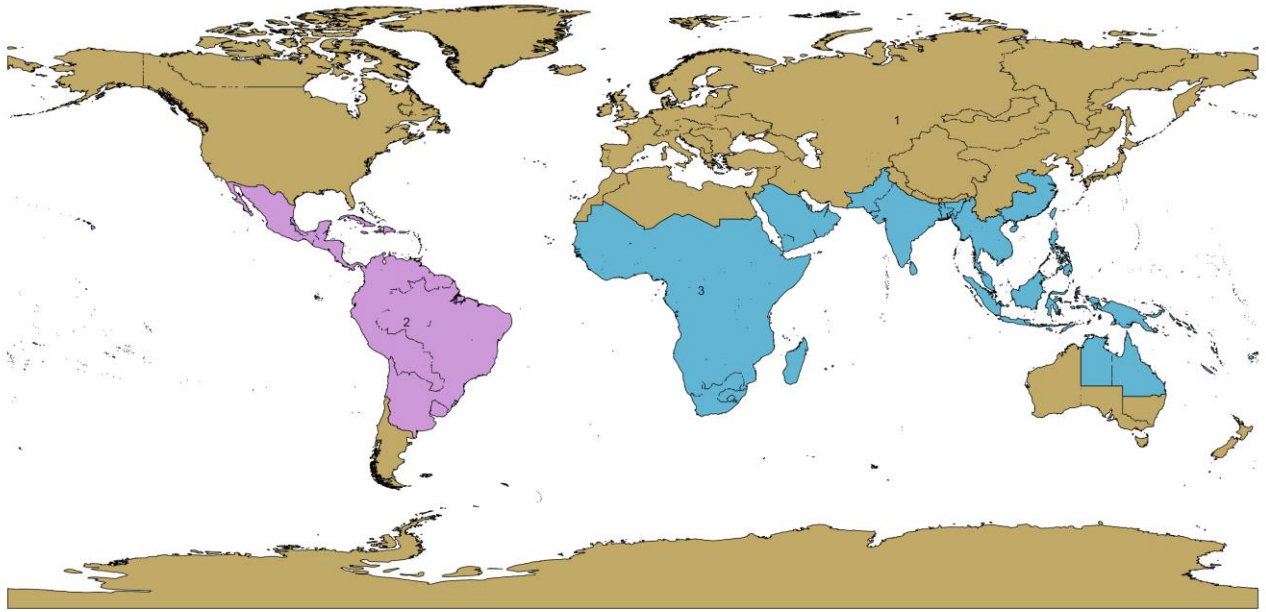

**Figure S5.** Poales botanical regions grouped into three ‘floristic kingdoms’ based on phylogenetic beta diversity, indicated by different colours and numbers

**Table S2. Calibrations used in the treePL (Smith & O’Meara, 2012) configuration file.**

| Clade                            | min   | max   | Backbone | tip_subclade1             | tip_subclade2            | Reference                                               | Note                                                            |
|----------------------------------|-------|-------|----------|---------------------------|--------------------------|---------------------------------------------------------|-----------------------------------------------------------------|
| Poales                           | 120,1 | 120,1 | yes      | (all)                     | (all)                    | Givnish et al. 2018                                     | secondary; crown age used                                       |
| Bromeliaceae                     | 19,9  | 19,9  | yes      | Brocchinia_prismatica     | Portea_fosteriana        | Givnish et al. 2018                                     | secondary; crown age used                                       |
| Typhaceae                        | 70,4  | 70,4  | yes      | Typha                     | Sparganium               | Givnish et al. 2018                                     | secondary; crown age used                                       |
| Rapateaceae                      | 44,6  | 44,6  | yes      | Stegolepis_hitchcockii    | Rapatea_paludosa         | Givnish et al. 2018                                     | secondary; crown age used; Potarophytum-Rapatea-Stegolepis      |
| Thurniaceae                      | 33,9  | 33,9  | no       | Thurnia_sphaerocephala    | Prionium_serratum        | Givnish et al. 2018                                     | secondary; crown age used; not constrained in backbone - only 1 |
| Juncaceae                        | 67,8  | 67,8  | yes      | Juncus_pauciflorus        | Luzula_elegans           | Givnish et al. 2018                                     | secondary; crown age used                                       |
| Juncaceae_Cyperaceae_Thurniaceae | 107,4 | 107,4 | yes      | Thurnia_sphaerocephala    | Cyperus_diffusus         | Givnish et al. 2018                                     | secondary; crown age used                                       |
| Juncaceae_Cyperaceae             | 90,8  | 90,8  | yes      | Juncus_pauciflorus        | Cyperus_diffusus         | Givnish et al. 2018                                     | secondary; crown age used                                       |
| Xyridaceae                       | 92,5  | 92,5  | yes      | Xyris_jupicai             | Abolboda_grandis         | Givnish et al. 2018                                     | secondary; crown age used                                       |
| Eriocaulaceae                    | 66,6  | 66,6  | yes      | Comanthera_kegeliana      | Eriocaulon_australe      | Givnish et al. 2018                                     | secondary; crown age used                                       |
| Restionaceae                     | 104,6 | 104,6 | yes      | Hopkinsia_anoectocolea    | Restio_wittebergensis    | Givnish et al. 2018                                     | secondary; crown age used                                       |
| graminids                        | 106,6 | 106,6 | yes      | Flagellaria_neocaledonica | Andropogon_tracyi        | Givnish et al. 2018                                     | secondary; crown age used                                       |
| Ecdeiocoleaceae                  | 70,1  | 70,1  | yes      | Ecdeiocolea_monostachya   | Georgeantha_hexandra     | Givnish et al. 2018                                     | secondary; crown age used                                       |
| Cyperaceae                       | 75    | 88    | yes      | Hypolytrum_longifolium    | Schoenus_exilis          | inclusive of Spalink et al., 2016, Givnish et al., 2018 | Secondary                                                       |
| Carex                            | 34    | 38    | no       | Carex_moupinensis         | Carex_longii             | Jiménez-Mejías et al. (2016)                            | Fossil: Carex colwellensis                                      |
| Carex_Vignea_clade               | 16    | 23    | no       | Carex_gibba               | Carex_tribuloides        | Jiménez-Mejías et al. (2016)                            | Fossil: Carex marchica                                          |
| Cyperus                          | 24    | 32    | no       | Cyperus_prolifer          | Cyperus_nipponicus       | Spalink et al., 2016                                    | Secondary                                                       |
| Eleocharis                       | 31    | 41    | no       | Eleocharis_robbinsii      | Eleocharis_spiralis      | Spalink et al., 2016                                    | Secondary                                                       |
| Fimbristylis                     | 30    | 40    | no       | Fimbristylis_compacta     | Fimbristylis_densa       | Spalink et al., 2016                                    | Secondary                                                       |
| Rhynchospora                     | 40    | 50    | no       | Rhynchospora_corniculata  | Rhynchospora_megalocarpa | Spalink et al., 2016                                    | Secondary                                                       |
| Scleria                          | 38    | 48    | no       | Scleria_brownii           | Scleria_virgata          | Smith et al., 2010                                      | Fossil                                                          |
| Poaceae                          | 75    | 95    | yes      | Anomochloa_marantoidea    | Andropogon_tracyi        | Gallaher et al. 2021                                    | secondary                                                       |
| BOP                              | 65    | 85    | no       | Agrostis_lenis            | Streptogyna_americana    | Gallaher et al. 2021                                    | secondary                                                       |
| PACMAD                           | 45    | 70    | no       | Sartidia_jucunda          | Andropogon_tracyi        | Gallaher et al. 2021                                    | secondary                                                       |

## References

- Gallaher TJ, Peterson PM, Soreng RJ, Zuloaga FO, Li DZ, Clark LG, Tyrrell CD, Welker AD, Kellogg EA, Teisher JK. 2022.** Grasses through space and time: An overview of the biogeographical and macroevolutionary history of Poaceae. *Journal of Systematics and Evolution* **60**: 522–569.
- Givnish TJ, Zuluaga A, Spalink D, Soto Gomez M, Lam VK, Saarela JM, Sass C, Iles WJ, De Sousa DJ, Leebens-Mack J, et al. 2018.** Monocot plastid phylogenomics, timeline, net rates of species diversification, the power of multi-gene analyses, and a functional model for the origin of monocots. *American Journal of Botany* **105**: 1888-1910.
- Jiménez-Mejías P, Martinetto E, Momohara A, Popova S, Smith SY, Roalson EH. 2016.** A commented synopsis of the pre-Pleistocene fossil record of Carex (Cyperaceae). *The Botanical Review* **82**: 258–345.
- Smith SY, Collinson ME, Rudall PJ, Simpson DA. 2010.** Cretaceous and Paleogene fossil record of Poales: review and current research. Diversity, phylogeny, and evolution in the monocotyledons (ed. by Seberg O, Peterson G, Barford AS, Davis JJ), pp. 333–356. Aarhus University Press, Lancaster.
- Spalink D, Drew BT, Pace MC, Zaborsky JG, Starr JR, Cameron KM, Givnish TJ, Sytsma KJ. 2016.** Biogeography of the cosmopolitan sedges (Cyperaceae) and the area-richness correlation in plants. *Journal of Biogeography* **43**: 1893–1904.

**Table S4.** Comparison of six ancestral area reconstruction models based on BioGeoBEARS analyses for Poales.

| Model        | Log-likelihood | Number of parameters | Rate of dispersal | Rate of extinction | Jump dispersal | AICc  |
|--------------|----------------|----------------------|-------------------|--------------------|----------------|-------|
| DEC          | -21114         | 2                    | 0,026             | 0,15               | 0              | 42233 |
| DEC + J      | -21879         | 3                    | 0,013             | 1,00E-12           | 0,0058         | 43765 |
| DIVALIKE + J | -23148         | 3                    | 0,014             | 3,30E-09           | 0,007          | 46303 |
| DIVALIKE     | -23831         | 2                    | 0,017             | 0,0037             | 0              | 47666 |

AICc: corrected Akaike's information criterion; dispersal-extinction-cladogenesis (DEC); DIVALIKE (Dispersal-Vicariance Analysis).

**Table S5.** Results from corHMM ancestral state reconstructions.

**Table S5a.** Models (2 rates vs. 1 rate and ARD vs. SYM), AIC of the best model, deltaAIC in comparison with the best fit model are indicated.

| Trait         | Model       | AIC     | deltaAIC |
|---------------|-------------|---------|----------|
| Open / Closed | 2 Rates ARD | 8814,2  | NA       |
|               | 1 Rate ARD  | 9740,6  | 926,4    |
|               | 2 Rates SYM | 9707,8  | 893,6    |
|               | 1 Rate SYM  | 10906,1 | 2091,9   |

**Table S5b.** Model parameters associated with the 2 Rates ARD model.

| Trait         | Model   | 1R1 to 2R | 1R1 to 1R | 2R1 to 1R | 2R1 to 2R | 1R2 to 1R | 1R2 to 2R | 2R2 to 2R | 2R2 to 1R2 |
|---------------|---------|-----------|-----------|-----------|-----------|-----------|-----------|-----------|------------|
| Open / Closed | 2 Rates | 0,31      | 0,07      | 0,51      | 0,07      | 0,005     | 1E-09     | 0,005     | 0,01       |

corHMM: Hidden Markov Models of Character Evolution; AIC: Akaike information criterion; ARD: all-rates-different; SYM: symmetrical model; 1: state 1; 2: state 2; R1: rate regime 1; R2: rate regime 2

corHMM: Hidden Markov Models of Character Evolution; AIC: Akaike information criterion; ARD: all-rates-different; SYM: symmetrical model; 1: state 1; 2: state 2; R1: rate regime 1; R2: rate regime 2

The evolutionary history of important traits for Poales was reconstructed using Generalized Hidden Markov models, as implemented in the function corHMM of R package corHMM v.2.8 (Boyko & Beaulieu, 2021), to estimate the transition rates and ancestral state of several binary characters across the Poales tree phylogeny.

For each open / closed habitat binary trait, we ran the following Markov models:

- symmetric rate (SYM: one transition rate category; one parameter): transition rate (1 parameter); no hidden states
- all rates differ (ARD: one transition rate category; two parameters): transition rate for each regime (2 parameters); no hidden states
- symmetric rate (SYM: two transition rate categories; four parameters): transition rate for each regime (2 parameters); backward rate connecting two transition rate categories (1 parameter); forward rate connecting two transition rate categories (1 parameter); 2 hidden states; and
- all rates differ ARD: two transition rate categories; six parameters): two transition rates for each transition rate regime (4 parameters); two rates connecting the two transition rate categories (2 parameters); 2 hidden states.



## Notes S1. Additional details on the phylogenomic backbone reconstruction.

We produced a family-level phylogenomic backbone using nuclear data from 353 loci (Angiosperms353; Johnson *et al.*, 2019). The sampling for the backbone aimed towards 50% of the currently accepted genera and involved new data produced and samples mined from public repositories. The genomic data production was conducted following Baker *et al.* (2022), with DNA extractions (mostly from herbarium materials) using CTAB (Doyle & Doyle, 1987). We used the NEBNext Ultra II DNA Library Prep kit (New England Biolabs) for standard pair-ended library preparation and libraries were hybridised with myBaits Angiosperms353 v1 probe kit (Arbor Biosciences).

The sequence recovery from raw data (target enrichment and mined reads) started with reads being trimmed for short and/or low-quality sequences using Trimmomatic (Bolger *et al.*, 2014) and then assembled with a *de novo* approach implemented in HybPiper v.1.3.1 (Johnson *et al.*, 2016). In HybPiper, trimmed reads were initially binned into genes using BLASTN, which were assembled into scaffolds using SPADes (Bankevich *et al.*, 2012), and the coding regions later extracted with Exonerate (Slater & Birney, 2005). For assembled datasets (i.e., whole genomes and transcriptomes) sequence recovery followed Baker *et al.* (2022).

We inferred the phylogenomic backbone using a multi-species coalescent framework (MSC) based on individual gene trees. Sequences were aligned in MAFFT (Katoh & Standley, 2013) in *insi*-mode, with gappy sites (> 90% missing data) removed using Phyutility (Smith & Dunn, 2008). Gene trees were inferred using IQ-TREE 2 (Minh *et al.*, 2020), with support assessed via UltraFast bootstrap (UFBS; Hoang *et al.*, 2018). TreeShrink (Mai & Mirarab, 2018) was used to identify outliers that significantly increased tree space. Alignment and tree building was repeated for those genes with outlier trees. All gene trees were subsequently trimmed for poorly supported branches (UFBS < 30%) and used as input for the MSC analysis in ASTRAL-III (Zhang *et al.*, 2018). To obtain a species tree with branch lengths proportional to the genetic distance, we first ranked the genes according to the congruence of their resulting trees to the species tree using SortaDate (Smith *et al.*, 2018) and then concatenated the alignments of the 25 most congruent genes. Using the MSC species tree as topological constraint and this concatenated alignment, a new phylogram was inferred in IQ-Tree 2. For more details on library preparation and data analyses, please refer to Baker *et al.* (2022).

## References

- Baker WJ, Bailey P, Barber V, Barker A, Bellot S, Bishop D, Botigué LR, Brewer G, Carruthers T, Clarkson JJ, et al. 2022.** A comprehensive phylogenomic platform for exploring the Angiosperm tree of life. *Systematic Biology* **71**: 301–319.
- Bankevich A, Nurk S, Antipov D, Gurevich AA, Dvorkin M, Kulikov AS, Lesin VM, Nikolenko SI, Pham S, Prjibelski AD, et al. 2012.** SPAdes: A new genome assembly algorithm and its applications to single-cell sequencing. *Journal of Computational Biology* **19**: 455–477.
- Bolger AM, Lohse M, Usadel B. 2014.** Trimmomatic: a flexible trimmer for Illumina sequence data. *Bioinformatics* **30**: 2114–2120.
- Doyle JJ, Doyle JL. 1987.** A rapid DNA isolation procedure for small quantities of fresh leaf tissue. *Phytochemical Bulletin* **19**: 11–15.
- Hoang DT, Chernomor O, Haeseler A, Minh BQ, Vinh LS. 2018.** UFBoot2: Improving the Ultrafast Bootstrap Approximation. *Molecular Biology and Evolution* **35**: 518–522.
- Johnson MG, Gardner EM, Liu Y, Medina R, Goffinet B, Shaw AJ, Zerega NJC, Wickett NJ. 2016.** HybPiper: Extracting coding sequence and introns for phylogenetics from high-throughput sequencing reads using target enrichment. *Applications in Plant Sciences* **4**: 1600016.
- Johnson MG, Pokorny L, Dodsworth S, Botigue LR, Cowan RS, Devault A, Eiserhardt WL, Epitawalage N, Forest F, Kim JT, et al. 2019.** A universal probe set for targeted sequencing of 353 nuclear genes from any flowering plant designed using k-medoids clustering. *Systematic Biology* **68**: 594–606.
- Katoh K, Standley DM. 2013.** MAFFT multiple sequence alignment software version 7: improvements in performance and usability. *Molecular Biology and Evolution* **30**: 772–780.
- Mai U, Mirarab S. 2018.** TreeShrink: fast and accurate detection of outlier long branches in collections of phylogenetic trees. *BMC Genomics* **19**: 272.
- Minh BQ, Schmidt HA, Chernomor O, Schrempf D, Woodhams MD, Haeseler A, Lanfear R. 2020.** IQ-TREE 2: New models and efficient methods for phylogenetic inference in the genomic era. *Molecular Biology and Evolution* **37**: 1530–1534.

**Slater GSC, Birney E. 2005.** Automated generation of heuristics for biological sequence comparison. *BMC Bioinformatics* **6**: 31.

**Smith SA, Dunn CW. 2008.** Phyutility: a phyloinformatics tool for trees, alignments and molecular data. *Bioinformatics* **24**: 715–716.

**Smith SA, Brown JW, Walker JF. 2018.** So many genes, so little time: A practical approach to divergence-time estimation in the genomic era. *PLOS ONE* **13**: e0197433.

<https://doi.org/10.1371/journal.pone.0197433>

**Zhang C, Rabiee M, Sayyari E, Mirarab S. 2018.** ASTRAL-III: polynomial time species tree reconstruction from partially resolved gene trees. *BMC Bioinformatics* **19**: 153.

## **Notes S2. Justification for selecting dispersal-extinction-cladogenesis (DEC) model of ancestral estimation.**

Because phyloregions are determined by spatial patterns of lineage turnover, they reflect – but do not necessarily conform to – discrete geologic boundaries typically used in ancestral area estimations (e.g., Martín-Bravo *et al.*, 2019). However, these phyloregions present a data-driven hypothesis for the spatial relationship of areas as they relate to the biogeographical processes of dispersal and vicariance in Poales, and are thus well-suited for ancestral estimations. We *a priori* selected the dispersal-extinction-cladogenesis (DEC) model of ancestral estimation (Ree *et al.*, 2005; Ree & Smith, 2008) instead of other available models (e.g., DIVA, Ronquist *et al.*, 1997; BayArea, Landis *et al.*, 2013), because our expectation is that the parameters of this model are best suited to the particular biology and distribution of Poales. For example, we expect both cladogenetic sympatry and vicariance to be important processes in Poales, particularly when descendent lineages diverge within only a portion of the ancestral range (i.e., subset sympatry) and when vicariant events unevenly split an ancestral range between two descendent ranges (i.e., narrow vicariance). The former scenario is not modelled by DIVA, while the latter is not modeled by BayArea. Given that the BayArea model does not parameterize vicariant speciation but instead allows widespread sympatric speciation, we do not consider it a reasonable model for the global analysis of a clade that spans 120 millions years of evolution. Indeed, the BayAreaLIKE model places the Poales in a nearly cosmopolitan range for the first 40 million years of its evolution, which is neither supported by fossil data nor biologically plausible. Many Poalean lineages are exceptionally good dispersers and able to migrate across typical migration barriers (e.g., oceans; Linder *et al.*, 2018; Martín-Bravo *et al.*, 2019, Spalink *et al.*, 2019; Larridon *et al.*, 2021, Benítez-Benítez *et al.*, 2021), while lineages with species with poor dispersal ability tend to be restricted to single or physically adjacent phyloregions (e.g., Rapateaceae, Bromeliaceae). Highly parameterized models – with time-stratification or with geographic dispersal multipliers – are unlikely to be a good fit for all clades in the exceptionally diverse Poales. Thus subsequent analyses are based on the DEC model.

## **References**

**Benítez-Benítez C, Martín-Bravo S, Bjarå CS, Gebauer S, Hipp AL, Hoffmann MH, Luceño M, Pedersen TM, Reznicek A, Roalson E. 2021.** Geographical vs. ecological diversification in *Carex*

- section *Phacocystis* (Cyperaceae): Patterns hidden behind a twisted taxonomy. *Journal of Systematics and Evolution* **59**: 642–667.
- Landis MJ, Matzke NJ, Huelsenback JP. 2013.** Bayesian analysis of biogeography when the number of areas is large. *Systematic Biology* **62**: 789–804.
- Larridon, I., Spalink, D., Jiménez-Mejías, P., Márquez-Corro, J.I., Martín-Bravo, S., Muasya, M. and Escudero, M., 2021.** The evolutionary history of sedges (Cyperaceae) in Madagascar. *Journal of Biogeography* **48**: 917–932.
- Linder HP, Lehmann CER, Archibald S, Osborne CP, Richardson DM. 2018.** Global grass (Poaceae) success underpinned by traits facilitating colonization, persistence and habitat transformation. *Biological Reviews* **93**: 1125–1144.
- Martín-Bravo S, Jiménez-Mejías P, Villaverde T, Escudero M, Hahn M, Spalink D, Roalson EH, Hipp AL, the Global *Carex* Group. 2019.** A tale of worldwide success: Behind the scenes of *Carex* (Cyperaceae) biogeography and diversification. *Journal of Systematics and Evolution* **57**: 695–718.
- Ree RH, Moore BR, Webb CO, Donoghue MJ. 2005.** A likelihood framework for inferring the evolution of geographic range on phylogenetic trees. *Evolution* **59**: 2299–2311.
- Ree RH, Smith SA. 2008.** Maximum likelihood inference of geographic range evolution by dispersal, local extinction, and cladogenesis. *Systematic Biology* **57**: 4–14.
- Ronquist F. 1997.** Dispersal–vicariance analysis: a new approach to the quantification of historical biogeography. *Systematic Biology* **46**: 195–203.
- Spalink D, MacKay R, Sytsma KJ. 2019.** Phylogeography, population genetics, and distribution modelling reveal vulnerability of *Scirpus longii* (Cyperaceae) and the Atlantic Coastal Plain Flora to climate change. *Molecular Ecology* **28**: 2046–2061.
